# Supplementary material for: Nitroxide mediated controlled synthesis of glycidyl methacrylate-rich copolymers enabled by SG1-based alkoxyamines bearing succinimidyl ester groups
Source: Royal Society of Chemistry journal article supplement (doi:10.1039/c1py00190f), 2011-01-01
Supplement: c1py00190f.pdf [file c1py00190f.pdf]

Supporting Information for “Nitroxide mediated controlled synthesis of glycidyl methacrylate-rich copolymers enabled by SGI-based alkoxyamines bearing succinimidyl ester groups”

Ali Moayeri<sup>a</sup>, Benoit Lessard<sup>a</sup> and Milan Maric<sup>\*a</sup>  
Department of Chemical Engineering, McGill University  
3610 University Street  
Montreal, QC, H3A 2B2

In Figure 3, the apparent rate constants ( $k_p[\text{P}\cdot]$  where  $k_p$  is the propagation rate constant and  $[\text{P}\cdot]$  is the concentration of propagating macroradicals) determined experimentally from the  $\ln[1/(1-X)]$  versus time plots ( $X$  = monomer conversion) were plotted as a function of initial monomer feed composition ( $f_{\text{GMA}} = 1 - f_{\text{ST}}$ ) for glycidyl methacrylate (GMA)/styrene (ST) mixtures. The apparent rate constants dramatically increase at high GMA feed compositions and an expression was derived for  $k_p[\text{P}\cdot]$  in an attempt to predict the experimental observations. Below is how a predictive expression for  $k_p[\text{P}\cdot]$  was derived and compared to the experimental data.

First, the  $k_p$  is actually an average  $k_p$  for the mixture and is denoted herein as  $\langle k_p \rangle$ . Expressions for  $\langle k_p \rangle$  have been derived using terminal or penultimate kinetic copolymerization models<sup>1</sup>. Here, we use the penultimate model as such a model can better describe most copolymerization kinetic systems, even though the copolymer composition can be predicted well by a terminal model<sup>1</sup>. For an implicit penultimate model,  $\langle k_p \rangle$  is given by:

$$\langle k_p \rangle = \frac{r_{\text{ST}}f_{\text{ST}}^2 + 2f_{\text{ST}}f_{\text{GMA}} + r_{\text{GMA}}f_{\text{GMA}}^2}{r_{\text{ST}}\frac{f_{\text{ST}}}{k_{p,\text{ST}}} + r_{\text{GMA}}\frac{f_{\text{GMA}}}{k_{p,\text{GMA}}}} \quad [1]$$

where  $r_{\text{ST}}$  and  $r_{\text{GMA}}$  are the monomer reactivity ratios for ST and GMA, respectively,  $f_{\text{ST}}$  and  $f_{\text{GMA}}$  ( $f_{\text{GMA}} = 1 - f_{\text{ST}}$ ) are the feed compositions of ST and GMA, respectively. Also,  $\overline{k_{p,\text{ST}}}$  and  $\overline{k_{p,\text{GMA}}}$  are given by:

$$\overline{k_{p,\text{ST}}} = k_{p,\text{ST}} \frac{r_{\text{ST}}f_{\text{ST}} + f_{\text{GMA}}}{r_{\text{ST}}f_{\text{ST}} + \frac{f_{\text{GMA}}}{s_{\text{ST}}}} \quad [2a]$$

$$\overline{k_{p,\text{GMA}}} = k_{p,\text{GMA}} \frac{r_{\text{GMA}}f_{\text{GMA}} + f_{\text{ST}}}{r_{\text{GMA}}f_{\text{GMA}} + \frac{f_{\text{ST}}}{s_{\text{GMA}}}} \quad [2b]$$

where  $k_{p,\text{ST}}$  and  $k_{p,\text{GMA}}$  are the homopolymerization propagation rate constants of ST and GMA, respectively and  $s_{\text{ST}}$  and  $s_{\text{GMA}}$  are the radical reactivity ratios. All of the monomer and radical reactivity ratios were taken from Wang and Hutchinson<sup>2</sup> while the propagation rate constants were taken from the appropriate literature<sup>3,4</sup>. All of the parameters used for the estimation of  $k_p[\text{P}\cdot]$  are summarized in Table S1.

Next, we need to evaluate  $[P\cdot]$  for a nitroxide mediated controlled radical polymerization. For this, we use the expression derived by Fischer<sup>5</sup>. It assumes that irreversible termination is not omitted from the polymerization mechanism.

$$[P\cdot] = \left( \frac{\langle K \rangle [I]_0}{3 \langle k_t \rangle} \right)^{1/3} t^{-1/3} \quad [3]$$

In Equation [3] above,  $\langle K \rangle$  is the average equilibrium constant,  $[I]_0$  is the initial concentration of nitroxide,  $\langle k_t \rangle$  is the average termination rate constant and  $t$  is the time. For the implicit penultimate model, Charleux and co-workers derived the following expression for  $\langle K \rangle$ <sup>6</sup>.

$$\langle K \rangle = \frac{\frac{r_{ST} f_{ST}}{k_{p,ST}} + \frac{r_{GMA} f_{GMA}}{k_{p,GMA}}}{\frac{r_{ST} f_{ST}}{k_{p,ST} K_{ST}} + \frac{r_{GMA} f_{GMA}}{k_{p,GMA} K_{GMA}}} \quad [4]$$

Note that the individual equilibrium constant for ST is available from experimental data<sup>7</sup> but that of GMA is not available and was estimated by the available data from the related methyl methacrylate (MMA)<sup>8</sup>. Finally,  $\langle k_t \rangle$  was taken for the penultimate model using the following expression<sup>9</sup>:

$$\langle k_t \rangle = \left( p_{ST} k_{t,ST}^{1/2} + p_{GMA} k_{t,GMA}^{1/2} \right)^2$$

where  $k_{t,ST}$  and  $k_{t,GMA}$  are the homo-termination rate constants for ST and GMA, respectively. Furthermore,  $p_{ST}$  and  $p_{GMA}$  were given by:

$$p_{ST} = \frac{\frac{r_{ST} f_{ST}}{k_{p,ST}}}{\frac{r_{ST} f_{ST}}{k_{p,ST}} + \frac{r_{GMA} f_{GMA}}{k_{p,GMA}}} \text{ and } p_{GMA} = 1 - p_{ST}.$$

$k_{t,ST}$  was taken from Beuermann and Buback<sup>4</sup> while  $k_{t,GMA}$  was not available from the literature and thus the termination rate constant for MMA was substituted in its place<sup>10</sup>. Thus, the product of  $\langle k_p \rangle [P\cdot]$  can be determined. Note however, that due to the  $[P\cdot]$  term, the expression is time dependent. To account for this,  $[P\cdot]$  at each composition was plotted as a function of time.  $[P\cdot]$  dramatically decreased and leveled to nearly a constant value after only a few minutes (Fig. S1). The concentration at 10 minutes was then taken as the steady value for  $[P]$ , which would have been reasonable during the time-scale of the experiments. Table S2 lists the  $[P\cdot]$  after 10 minutes as a function of feed composition. The  $[P\cdot]$  values were then multiplied by the expression for  $\langle k_p \rangle$  and plotted in Figure 3 of the manuscript along with the experimental data.

**Table S1:** List of parameters used for the estimation of the apparent rate constants for the nitroxide mediated copolymerization of styrene/glycidyl methacrylate mixtures at 90 °C.

| Parameter                                          | Value                           |
|----------------------------------------------------|---------------------------------|
| $r_{ST}$                                           | 0.292 <sup>ref. 2</sup>         |
| $r_{GMA}$                                          | 0.528 <sup>ref. 2</sup>         |
| $s_{ST}$                                           | 0.278 <sup>ref. 2</sup>         |
| $s_{GMA}$                                          | 1.046 <sup>ref. 2</sup>         |
| $k_{p,ST}$ (L mol <sup>-1</sup> s <sup>-1</sup> )  | 900 <sup>ref. 3</sup>           |
| $k_{p,GMA}$ (L mol <sup>-1</sup> s <sup>-1</sup> ) | 3000 <sup>ref. 4</sup>          |
| $K_{ST}$ (mol L <sup>-1</sup> )                    | 4.0 x 10 <sup>-10</sup> ref. 7  |
| $K_{GMA}$ (mol L <sup>-1</sup> )                   | 1.0 x 10 <sup>-7</sup> ref. 8,a |
| $k_{t,ST}$ (L mol <sup>-1</sup> s <sup>-1</sup> )  | 1.3 x 10 <sup>8</sup> ref. 4    |
| $k_{t,GMA}$ (L mol <sup>-1</sup> s <sup>-1</sup> ) | 2.6 x 10 <sup>7</sup> ref. 10,b |
| $[I]_0$ ((mol L <sup>-1</sup> ))                   | 0.020 <sup>c</sup>              |

<sup>a</sup> Since  $K_{GMA}$  was not available, the equilibrium constant for methyl methacrylate,  $K_{MMA}$ , was used in its place.

<sup>b</sup> Since  $k_{t,GMA}$  was not available, the termination rate constant for methyl methacrylate,  $k_{t,MMA}$ , was used in its place.

<sup>c</sup>  $[I]_0$  is the initial alkoxyamine concentration.

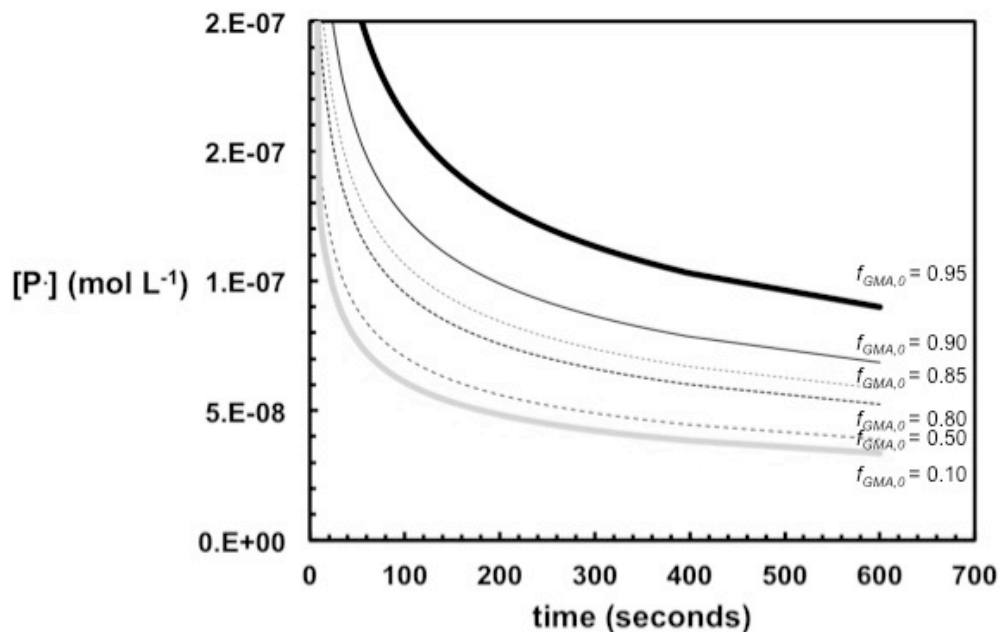

**Fig S1.** Plot of concentration of propagating radicals  $[P\cdot]$  as a function of time (using Equation 3).

**Table S2:** Estimates of the propagating radical concentration  $[P\cdot]$  as a function of feed glycidyl methacrylate (GMA)/styrene (ST) feed compositions.

| <i>GMA feed composition</i> $f_{GMA,0}$ | $[P\cdot]_{t=10 \text{ min}}$ (mol L <sup>-1</sup> ) |
|-----------------------------------------|------------------------------------------------------|
| 0                                       | $3.2 \times 10^{-8}$                                 |
| 0.1                                     | $3.4 \times 10^{-8}$                                 |
| 0.2                                     | $3.5 \times 10^{-8}$                                 |
| 0.3                                     | $3.6 \times 10^{-8}$                                 |
| 0.4                                     | $3.7 \times 10^{-8}$                                 |
| 0.5                                     | $3.9 \times 10^{-8}$                                 |
| 0.6                                     | $4.1 \times 10^{-8}$                                 |
| 0.7                                     | $4.5 \times 10^{-8}$                                 |
| 0.8                                     | $5.2 \times 10^{-8}$                                 |
| 0.85                                    | $5.8 \times 10^{-8}$                                 |
| 0.9                                     | $6.9 \times 10^{-8}$                                 |
| 0.95                                    | $9.0 \times 10^{-8}$                                 |
| 1                                       | $3.5 \times 10^{-7}$                                 |

## References

1. T. Fukuda, Y.-D. Ma and H. Inagaki, *Macromolecules*, 1985, **18**, 17-26.
2. W. Wang and R. A. Hutchinson, *Macromolecules*, 2008, **41**, 9011-9018.
3. M. Buback, R. G. Gilbert, R. A. Hutchinson, B. Klumperman, F. D. Kutchta, B. G. Manders, K. F. O'Driscoll, G. T. Russell and J. Schweer, *Macromol. Chem. Phys.* 1995, **196**, 3267-3280.
4. S. Beuermann and M. Buback, *Prog. Polym. Sci.*, 2002, **27**, 191-254.
5. H. Fischer, *J. Polym. Sci. Part A: Polym. Chem.*, 1999, **37**, 1885-1901.
6. B. Charleux, J. Nicolas and O. Guerret, *Macromolecules*, 2005, **38**, 5485-5492.
7. D. Benoit, S. Grimaldi, S. Robin, J. P. Finet, P. Tordo and Y. Gnanou, *J. Am. Chem. Soc.*, 2000, **122**, 5929-5939.
8. G. S. Ananchenko, M. Souaille, H. Fischer, C. Le Mercier and P. Tordo, *J. Polym. Sci. Part A: Polym. Chem.*, 2002, **40**, 3264-3283.
9. Y.-D. Ma, K.-S. Sung, Y. Tsujii and T. Fukuda, *Macromolecules*, 2001, **34**, 4749-4756.
10. M. S. Matheson, E. E. Auer, E. B. Bevilacqua, E. J. Hart, *J. Am. Chem. Soc.*, 1949, **71**, 497-504.
